# Supplementary material for: ﻿Reinstatement of Ticanto (Leguminosae-Caesalpinioideae) – the final piece in the Caesalpinia group puzzle
Source: PhytoKeys. 2022 Aug 22;205:59–98. doi: 10.3897/phytokeys.205.82300 (PMC9849013; doi:10.3897/phytokeys.205.82300)
Supplement: Supplementary material 1 — Appendix 1 [file phytokeys-205-059_article-82300__-s001.xlsx]

## Sheet: Sheet1
Species	Voucher	Herbarium	Country (ISO abbreviation)	Province	Locality	Latitude	Longitude	Source
Ticanto caesia	s. coll. s.n.	PEY	CHN	Guangxi	Fangcheng, Naliang	21.6805	107.853	traced
Ticanto caesia	Shiwandashan Exped. 3224	IBK	CHN	Guangxi	Fangcheng, Dongzhong, Dakeng Village	21.614	107.534	traced
Ticanto caesia	H. Fenzel s.n.	IBSC	CHN	Hainan		19.1748	109.718	traced
Ticanto crista	s. coll. s.n.	MEL	AUS	New South Wales	Sydney	-33.8667	151.217	GBIF
Ticanto crista	H.L. Griffith s.n.	BRI	AUS	Queensland	Mackay	-21.1434	149.187	GBIF
Ticanto crista	W.J. McDonald, J.P. Stanton & D.G. Fell 4499	BRI	AUS	Queensland	Hidden Valley, Cape Hillsborough NP (NP 60 Ossa)(Cumberland Islands 8759-132840)	-20.9256	149.019	GBIF
Ticanto crista	W. Cooper 698A	CNS	AUS	Queensland	Hull River, South Mission Beach	-17.9835	146.07	GBIF
Ticanto crista	L.J. Brass 2157	BRI	AUS	Queensland	Daintree River	-16.1821	145.289	GBIF
Ticanto crista	W. Poland 6	BRI	AUS	Queensland	Bloomfield River	-15.9312	145.35	GBIF
Ticanto crista	F.R. Morris 8255	NSW	AUS	Queensland	Broughten River, 8 miles [12.9 km] S of Charters Towers	-20.17	146.35	GBIF
Ticanto crista	A. Dietrich 2752	MEL	AUS	Queensland	Port Denison	-20.05	148.25	GBIF
Ticanto crista	A. Thorsborne 363	BRI	AUS	Queensland	ca. 100m W of bridge over Sunday Creek Bruce HWY ca. 32k S of Cardwell	-18.5068	146.176	GBIF
Ticanto crista	N. Byrnes MB131	BRI	AUS	Queensland	North Maria Creek	-17.7568	146.059	GBIF
Ticanto crista	H.G. Ladbrook s.n.	BRI	AUS	Queensland	Johnstone River	-17.4985	145.501	GBIF
Ticanto crista	F.R. Morris CAIRNS 08255	CNS	AUS	Queensland	Boughton Creek, Cairns	-16.94	145.817	GBIF
Ticanto crista	T. Pentzke s.n.	MEL	AUS	Queensland	Daintree River	-16.1167	145.267	GBIF
Ticanto crista	J.J. Wieringa 4199	WAG	AUS	Queensland	Queensland, Daintree area, Noah Creek, Mangroves	-16.1347	145.434	traced
Ticanto crista	A.M. Huq 310	US	BGD	Dacca	Ambitora forest	23.6807	90.3328	GBIF
Ticanto crista	Flagstaff 255	K	BGD		Chittagong	22.3569	91.7832	traced
Ticanto crista	Mokim s.n.	MEL	BGD		Sunderbuns [= Sunderbunds, on the Ganges delta.]	21.992	89.2034	GBIF
Ticanto crista	J.P. van Niel 4632		BRN	Borneo	Belait river, Belait	4.55	114.267	GBIF
Ticanto crista	Z.Y. Liu 182996	IMC	CHN	Chongqing	Mt. Jinyunshan	29.8436	106.394	traced
Ticanto crista	Jiulongpo Exped. 500107150402-289LY	IMC	CHN	Chongqing	Jiulongpo, Jinfeng, Baihe Village	29.51	106.284	traced
Ticanto crista	X.F. Zeng ZXF41029	CZH	CHN	Fujian	Zhangzhou, Zhaoan, Wushan, Jinshui Village	23.9245	117.152	traced
Ticanto crista	G.D. Ye 1208	IBSC	CHN	Fujian	Xiamen, Yunding Cliff	24.4629	118.153	traced
Ticanto crista	G.D. Ye 2482	FJSI	CHN	Fujian	Yunxiao, Huotian, Baihuayang Reservoir	24.0786	117.446	traced
Ticanto crista	W.D. Han 20667	NF	CHN	Fujian	Hua'an, Wenhua	24.8965	117.34	traced
Ticanto crista	H.B. Chen s.n.	FJSI	CHN	Fujian	Pinghe, Daxi, Jiangzhai Village	24.1208	117.111	traced
Ticanto crista	s. coll. s.n.	AU	CHN	Fujian	Zhao'an, Jinshui Village	23.9254	117.149	traced
Ticanto crista	X.F. Zeng ZXF19839	CZH	CHN	Fujian	Zhangzhou, Zhaoan, Mt. Wushan	23.8591	117.183	traced
Ticanto crista	S.Z. Zhang, L.Q. Li et al. 185	SZG	CHN	Guangdong	Shenzhen, Longgang, Nan'ao, Yangmeikeng	22.5421	114.572	traced
Ticanto crista	T.M. Tsui 231	NAS	CHN	Guangdong	Xin'an, Ng-tung Shan	22.639	114.366	traced
Ticanto crista	H.G. Ye 6379	IBSC	CHN	Guangdong	Dianbai, Luokeng, Mt. Shuangjiling	21.8282	111.278	traced
Ticanto crista	Yue78 5714	IBSC	CHN	Guangdong	Boluo, Mt. Luofushan, near Damiao	23.2831	114.005	traced
Ticanto crista	S.J. Li 30	IBSC	CHN	Guangdong	Zhaoqing, Mt. Dinghushan	23.1651	112.538	traced
Ticanto crista	J.Y. Chen 20165220	SN	CHN	Guangdong	Jiangmen, Mt. Guifengshan	22.5537	113.029	traced
Ticanto crista	Yue73 1182	CSFI	CHN	Guangdong	Ruyuan, Daqiao Health Center, back mountain	24.9779	113.143	traced
Ticanto crista	P.Y. Chen, B.H. Chen & G.C. Zhang 46	IBSC	CHN	Guangdong	Huidong, Pingshan Forest Farm, Mt. Chenshuishan, Zhulian?	22.9639	114.757	traced
Ticanto crista	K.W. Jiang KwT033	NPH	CHN	Guangdong	Qingyuan, Yangshan, near Qincaitang Reservoir	24.4998	112.71	traced
Ticanto crista	Z.Q. Song 2021057	IBSC	CHN	Guangdong	Zhaoqing, Mt. Dinghushan	23.1651	112.538	traced
Ticanto crista	Longtan & Dule Exped. 242	IBK	CHN	Guangxi	Liuzhou, Longtan Park, Mt. Jiaodingshan	24.2699	109.42	traced
Ticanto crista	H. Fung 21112	SYS	CHN	Guangxi	Yang-shoh	24.7631	110.482	traced
Ticanto crista	Y. Tsiang 4894	IBSC	CHN	Guizhou	Tungtze	28.3609	106.88	traced
Ticanto crista	S.P. Kao 52115	IBSC	CHN	Hainan	Wanning, Mt. Dongshan, the second mountain range	18.8396	110.38	traced
Ticanto crista	Z.X. Li et al. 911	IBSC	CHN	Hainan	Lin'gao, Maniao, Wende Village	19.9346	109.818	traced
Ticanto crista	S.K. Lau 3582	IBSC	CHN	Hainan	Kan-en, Chim Fung Ling, near Sam Mo Watt Village	18.7134	108.886	traced
Ticanto crista	Y. Zhong 4472	IBSC	CHN	Hainan	Qionghai, Lehui, near Shuangbang Village	19.3304	110.678	traced
Ticanto crista	G.W. Tang, Z.M. Li & J. Li TangGW2525	IBSC	CHN	Hainan	Wenchang, Longlou, nera Mt. Beijianshan	19.6811	111.013	traced
Ticanto crista	S.Y. Hu 9721	US	CHN	Hong Kong	Lantau Island	22.2665	113.942	GBIF
Ticanto crista	D.G. Zhang ZB130226624	JIU	CHN	Hubei	Shennongjia, Xingshan to Yangri	31.5624	110.791	traced
Ticanto crista	D.G. Zhang zdg4185	JIU	CHN	Hubei	Xingshan, Xiakou, Jianyangping, Lifangyan to Huangliang	31.4752	110.284	traced
Ticanto crista	C.J. Qi 3822	CSFI, IBSC	CHN	Hunan	Jianghua	24.9529	111.751	traced
Ticanto crista	K.D. Lei ZZ40516121	JIU	CHN	Hunan	Xiangxi, Yongshun, Zejia, Donglu Village	28.7785	109.749	traced
Ticanto crista	Z.C. Liu, W.J. Xiong, F. Ye, L. Deng, M. Tu, X.J. Zhang, L. Feng, Q.Y. Yin & N.N. Liu LXP-13-23687	SYS	CHN	Jiangxi	Ji'an, Suichuan, Daijiapu, Xianmo	26.3117	114.058	traced
Ticanto crista	Z.-H. Chen 277	TAIF	CHN	Taiwan	Hsinchu, Hsienchiaoshih	24.8757	121.108	traced
Ticanto crista	T.C. Huang ?	TAI	CHN	Taiwan	Nanwan	21.9647	120.806	GBIF
Ticanto crista	T.Y. Yang ?	TAI	CHN	Taiwan	Hengchun-Fengkang	22.0997	120.708	GBIF
Ticanto crista	Y. Kudo ?	TAI	CHN	Taiwan	Sanmingchu, Sankwaiseki Takao	22.6181	120.279	GBIF
Ticanto crista	S.F. Huang ?	TAI	CHN	Taiwan	Tsengwen Dam	23.2578	120.524	GBIF
Ticanto crista	Nakamura-Taizo ?	TAI	CHN	Taiwan	Sendanyama	24.3894	121.641	GBIF
Ticanto crista	H. Ohashi ?	TAI	CHN	Taiwan	Fengshan	24.8753	120.957	GBIF
Ticanto crista	W.X. Liu 277	HITBC	CHN	Yunnan	Hekou, Erqu	22.6933	103.862	traced
Ticanto crista	s. coll. 6410	HITBC	CHN	Yunnan	Hekou, Honghe, Mahuangbao Stream E, Bazi River, near Yaozhuang	22.5333	103.967	traced
Ticanto crista	D.A. Powell 306		CXR		Christmas Island, Indian Ocean, shore terrace north of Norris Point	-10.4683	105.716	GBIF
Ticanto crista	A.C. Smith 1459	US	FJI	Eastern Division	Vanua mbalavu i. [= vanua balavu i.] [Lau Is.]	-17.2285	178.951	GBIF
Ticanto crista	O.Degener 15532	US	FJI	Western Division	Ra Prov.: vicinity of rewasa, near vaileka	-17.3962	178.18	GBIF
Ticanto crista	E.Y. Hosaka 3319	K	FSM		Micronesia, Caroline Islands, Yap Group, Gorror Island, Central Plateau	9.44611	138.074	traced
Ticanto crista	P.J.A. Kessler et al. 1658		IDN	Borneo	South Kalimantan, road Pagatan-Sembamban	-3.63333	115.817	GBIF
Ticanto crista	A.J.G. H. Kostermans 4720		IDN	Borneo	Sampit regoin near Sampit	-2.53333	112.95	GBIF
Ticanto crista	Mondi 53		IDN	Borneo	Borneo Res. W. AFd. v. Borneo Pontianak Sei Poetat	0.45	111.767	GBIF
Ticanto crista	P.W. Korthals s.n.		IDN	Borneo	D[oe]far, Borneo	1	114	GBIF
Ticanto crista	Amdjah 1912/ 45		IDN	Borneo	Pladjoe, N. Borneo	3.78	117.5	GBIF
Ticanto crista	A.A. Ambriansyah 2318		IDN	Borneo	East Kalimantan, Sebuku river base camp, Kudamis, PT. Inhutani 1, Nunukan	3.93333	117.133	GBIF
Ticanto crista	Amdjah 1912/ 764		IDN	Borneo	N. Borneo; Soedjao	3.98333	116.833	GBIF
Ticanto crista	E.F. de Vogel 1395		IDN	Java	W. Java, Ujung Kulon Nature Reserve, Pulau Peucang, near Transect Kuswata	-6.73944	105.256	GBIF
Ticanto crista	Karta 280		IDN	Java	Semarang, P. Karimoendjawa	-5.84209	110.456	GBIF
Ticanto crista	J.D. Dorgelo 1767		IDN	Java	Resid. Kediri, Bay of Popoh	-8.28333	111.783	GBIF
Ticanto crista	A. Hoogerwerf 277A!		IDN	Java	Baloeran Reserve	-7.84694	114.36	GBIF
Ticanto crista	J.A. Larzing 1031		IDN	Java	S Kediri, Prigi	-7.0969	112.029	GBIF
Ticanto crista	C.A. Backer 15509		IDN	Java	Batang	-6.91667	109.75	GBIF
Ticanto crista	E.W. Clason C47		IDN	Java	Passir Poetih	-6.42194	106.782	GBIF
Ticanto crista	H. Raap 392		IDN	Java	Priok Kanaal.	-6.09194	106.882	GBIF
Ticanto crista	Karta 99		IDN	Java	Bawean, Kp. Teroesan.	-5.76667	112.667	GBIF
Ticanto crista	Jaheri 287		IDN	Moluccas	Key [Islands]	-5.3494	132.497	GBIF
Ticanto crista	E.A. de Wiljes-Hissink 13		IDN	Moluccas	Ambon, Soeli	-3.64672	128.146	GBIF
Ticanto crista	Atjeh & Expedition P. van Hulstijn 75		IDN	Moluccas	Soela Islands, Island Taliaboe, Tdj. Marieano	-1.83212	125.959	GBIF
Ticanto crista	H.P. Nooteboom 6111		IDN	Moluccas	Riverside upstream from Jirlay	-6.1426	134.526	GBIF
Ticanto crista	H.P. Nooteboom 5705a		IDN	Moluccas	Aru, P.Kobroor, upstreams from kampong Jierlai	-6.10554	134.419	GBIF
Ticanto crista	C.B. Robinson 538		IDN	Moluccas	Amboina	-3.65912	128.177	GBIF
Ticanto crista	V.M.A. Beguin 1435		IDN	Moluccas	Ternate, Sasa besar	0.762407	127.327	GBIF
Ticanto crista	V.M.A. Beguin 1764		IDN	Moluccas	Halmehara Islands, Galela	1.82311	127.78	GBIF
Ticanto crista	E.A. Widjaja, E. Wally & E.A.W. Subari 6075		IDN	New Guinea	Senggo	-8.14318	140.412	GBIF
Ticanto crista	E.A. Widjaja, E. Wally & E.A.W. Subari 6234		IDN	New Guinea	Sawa, Desa	-5.1577	138.217	GBIF
Ticanto crista	F.W. Willis et al. 82		IDN	New Guinea	Aikwa Estuary, Along tidal waters of Aikwa River, with Nypa and Diospyros.	-4.83333	136.983	GBIF
Ticanto crista	W.N. Takeuchi, E. Sambas & R.A. Maturbongs 16057		IDN	New Guinea		-2.46667	133.1	GBIF
Ticanto crista	J. Elbert 2628		IDN	Sulawesi	Sudost Celebes, Bau-Bau	-5.50721	122.597	GBIF
Ticanto crista	J. Elbert 2935		IDN	Sulawesi	Celebes, Insel Muna, Raha	-4.838	122.721	GBIF
Ticanto crista	C.G.G.J. van Steenis 10330		IDN	Sulawesi	Z. Celebes. Alo grotten (kalk-) bij Kalosi	-3.3502	119.818	GBIF
Ticanto crista	W. Meijer 9287		IDN	Sulawesi	Celebes, northern central part, near Palu, Palu Bay	-0.883333	119.883	GBIF
Ticanto crista	C.A. Wisse s.n.		IDN	Sulawesi	Celebes Res. Manado Meer van Tondano	1.3054	124.913	GBIF
Ticanto crista	J. van Borssum Waalkes 1690		IDN	Sumatra	Sumatra, West Coast, NW of Painan	-1.35	100.567	GBIF
Ticanto crista	H.B. Unknown 866		IDN	Sumatra	ad littora Siboga	1.75	98.8	GBIF
Ticanto crista	A.H.G. Alston 15377		IDN	Sumatra	Sumatra, Asahan River, near Tandjung Balai	2.96667	99.8	GBIF
Ticanto crista	J.A. Larzing 13137		IDN	Sumatra	N. Sumatra, Serdang, Pantei-tjermin	3.03806	99.0554	GBIF
Ticanto crista	H.S. Yates, 1873		IDN	Sumatra	Sumatra, Batu Bahra	3.25	99.5833	GBIF
Ticanto crista	T.M.A. Utteridge et al. 50		IDN		Pulau Puriri, a small island at the mouth of the Alkwa Estuary	-4.9	136.867	GBIF
Ticanto crista	unknown		IDN		West Sumatra	-1.03	100.4	GBIF
Ticanto crista	unknown		IDN		West Sumatra	-0.9492	100.354	GBIF
Ticanto crista	unknown		IDN		West Sumatra	-0.1282	100.697	GBIF
Ticanto crista	Saldanha 12397	MO	IND	Karnataka	Channarayapatna	12.859	76.3914	GBIF
Ticanto crista	Saldanha HFP2180	MO	IND	Karnataka	Hassan-Saklespur road	12.9561	75.9319	GBIF
Ticanto crista	Saldanha 15366	MO	IND	Karnataka	Near Holenarsipur	12.7974	76.2386	GBIF
Ticanto crista	T.S. Ralph 566	MEL	IND		Aurungabad [=Aurangabad]	19.8833	75.35	GBIF
Ticanto crista	Dr King's Collector	K	IND		S. Andaman	11.7821	92.6549	traced
Ticanto crista	R.J. Bell 7750	K	IND		Kaswar	25.3261	83.3762	traced
Ticanto crista	W.A. Talbot 1256	K	IND		North Kanara	22.3522	71.7311	traced
Ticanto crista	C.A. Barber 8788	K	IND		Kuppam River, Taliparamba	12.0887	75.3522	traced
Ticanto crista	N.P. Balakrishnan, H.P. Nooteboom, K.U. Kramer & G.B. Nair BSI 6483		IND		South Andaman. Chiriatapu, near the S. tip of the island. Coastal thickets on sand	11.5033	92.7059	GBIF
Ticanto crista	R.S. Raghavan 103382		IND		Flora of Goa. Pilegao.	15.2993	74.124	GBIF
Ticanto crista	N.P. Balakrishnan 611		IND		South Andamans. Guptapara, Tidal forests	11.5631	92.6593	GBIF
Ticanto crista	H.F. Mooney 3350		IND		India, common in the Tidal forests of the Mahonadi delta at Jambu, Cuhock district. *.	20.4034	86.6969	GBIF
Ticanto crista	N. Bhargava 1790		IND		Middle Andamans. Rangat Bay. Wastelands, Sandy loam	12.4892	92.9259	GBIF
Ticanto crista	T.S. Ralph 566	MEL	IND		Aurungabad [=Aurangabad]	19.8833	75.35	GBIF
Ticanto crista	unknown	TNS	JPN	Kagoshima		28.2	129.3	GBIF
Ticanto crista	unknown	KPM	JPN	Okinawa	Iriomotejima	24.3301	123.819	GBIF
Ticanto crista	unknown	NAC	JPN	Okinawa		24.7303	125.327	GBIF
Ticanto crista	unknown	KPM	JPN	Okinawa	Arume	26.6036	128.119	GBIF
Ticanto crista	K. Yasuda 1320		JPN	Okinawa	Urauchi, Taketomi cho	24.4058	123.778	GBIF
Ticanto crista	F. Fagerlind 7090	S	LKA	Kalutara	Beruwala, Barb. Reef	6.47391	79.992	GBIF
Ticanto crista	F. Fagerlind 4267	S	LKA	Kandy	Peradeniya	7.26987	80.5938	GBIF
Ticanto crista	P. Comanor 897	US	LKA		Ruhuna national park, buttawa beach area, between ocean and lagoon in plot r29	6.43889	81.6228	GBIF
Ticanto crista	J.F. Maxwell 98-1307		MMR	Tenasserim	Tawer, west of Kanbauk, Heinze River estuary; Yebyu Township	14.6	98.0333	GBIF
Ticanto crista	D.R. Khant 1079	K	MMR		Rangoon	16.8409	96.1735	traced
Ticanto crista	H.S. McKee 6069	K	MMR		Myebon	20.0472	93.3729	traced
Ticanto crista	J. Gueko	K	MUS		Mauritius, The Pouce	-20.1851	57.5153	traced
Ticanto crista	J.W. Purseglove 4959		MYS	Borneo	Serai, Bako National Park	1.71666	110.467	GBIF
Ticanto crista	K. Jumatin & Tuyuk Gangau SAN 92460		MYS	Borneo	Semporna, Bobay dulang island	4.47939	118.612	GBIF
Ticanto crista	J.P. van Niel 4166		MYS	Borneo	Lower Baram river, Sarawak	4.57168	113.993	GBIF
Ticanto crista	A. Gibot SAN 66643		MYS	Borneo	Kg. Usah, Weston	5.7125	115.596	GBIF
Ticanto crista	G.H.S. Wood A 2916		MYS	Borneo	Sandakan, Segaliud River, 20 miles W.S.W. of Sandakan	5.72143	117.812	GBIF
Ticanto crista	P.P.K. Chai S 29930		MYS	Borneo	Kampong Bako, Bako river	1.6667	110.417	GBIF
Ticanto crista	P.P.K. Chai S 30637		MYS	Borneo	Rejang F.R., 3rd Division	2.08333	111.267	GBIF
Ticanto crista	W.M.A. Brooke 8824		MYS	Borneo	Kelepu, Division III	2.46667	111.833	GBIF
Ticanto crista	T. Bidin SAN 80645		MYS	Borneo	Bukit Siunga, Weston, Beaufort	5.15	115.617	GBIF
Ticanto crista	A.A.A. Sigon et al. SAN 107298		MYS	Borneo	Ulu sungai Pinangah, Tongod	5.2	116.833	GBIF
Ticanto crista	Otik BNBFD 4916		MYS	Borneo	Kabili For. Res. Sandakan	5.83333	117.933	GBIF
Ticanto crista	L.S. Gibbs 4326		MYS	Borneo	Usaham Bay, Kota Belud	6.35	116.433	GBIF
Ticanto crista	Unknown KEP FRI 27396		MYS			2.7	102.517	GBIF
Ticanto crista	F.S.P. Ng FRI27396	CNS	MYS		Rompin - Nenasi road.	2.8833	103.317	GBIF
Ticanto crista	M. Ubaldus, J. Jemson, J.M. Postar & T. Tawadong SAN 149645		MYS		Kinabatangan, Kuala Sg. Lawa-Lawa	5.63767	118.462	GBIF
Ticanto crista	unknown	K	NCL		Yate, Touaourou	-22.1667	166.95	traced
Ticanto crista	A.U. Daniker		NCL		Neu Caledonien-Loyalitatsinseln. Liane, uit gelben Bluten, Zweige widerhakig stachelig aft in Walde bei Iacho Lifou.	-21.0385	167.241	GBIF
Ticanto crista	A. Guillaumin & H. HÃ¼rlimann		NCL		Broussaille sur sol calcaire Ã l'Ilot Maitre.	-22.3354	166.409	GBIF
Ticanto crista	H.S. MacKee	P	NCL			-22.3264	166.865	GBIF
Ticanto crista	H.S. MacKee	P	NCL			-20.7886	165.184	GBIF
Ticanto crista	H.S. MacKee	P	NCL			-20.2536	164.196	GBIF
Ticanto crista	R.E. Fuentes & de la Rosa PPI 38916		PHL	Calayan	Cagayan. Calayan Island, Brgy. Magsidel. Along the road.	19.32	121.467	GBIF
Ticanto crista	F.J.M. Gaerlan et al. PPI 2973		PHL	Luzon	Isabela Dikatkotan	16.9736	121.808	GBIF
Ticanto crista	E.J. Reynoso, E. Sagcal & R.E. Fuentes PPI 14622		PHL	Luzon	Camarines Sur. barangay Guijalo.	13.7967	123.667	GBIF
Ticanto crista	E.B. Barbon, E.M. Romero & L. Fernando PPI 1895		PHL	Mindanao	Agusan del Norte Tungao	8.77722	125.572	GBIF
Ticanto crista	F.J.M. Gaerlan, E.M. Romero & E. Sagcal PPI 13443		PHL	Palawan	Palawan, Quezon, Tawa-tawa.	9.46077	118.206	GBIF
Ticanto crista	E.B. Barbon, E.M. Romero & L. Fernando PPI 1620		PHL	Sabtang	Batanes Savidug	20.3053	121.845	GBIF
Ticanto crista	B.C. Stone, E.B. Barbon & H.G. Garcia PPI 9476		PHL	Siargao	Surigao del Norte. Poneas Is., Sitio Dabo. Found on coastal area.	9.90312	125.942	GBIF
Ticanto crista	E.M. Romero & R. S. Majaducon PPI s.n.		PHL	Visayas	Antique, Pungtod, barangay Semirara Island, Caluya.	12.0643	121.391	GBIF
Ticanto crista	J.E. Canfield 581	US	PLW	Airai	Airai mun., s babeldaob id., palau; along airport road near gihmel r	7.39676	134.569	GBIF
Ticanto crista	A.N. Millar NGF 38488		PNG	Bougainville	Rorovana Village, Kieta Sub-District, Bougainville. Regrowth near tidal creek	-6.25	155.667	GBIF
Ticanto crista	F. Panoff 49		PNG	East New Britain	East New Britain	-5.5	151.833	GBIF
Ticanto crista	D.B. Foreman LAE 52140		PNG	East New Britain	Sai River. Rabaul sub-district, East New Britain District. In swamp by river	-4.91667	151.75	GBIF
Ticanto crista	G.D. Weiblen YP4D0234		PNG	Madang	Yawan Village	-6.16419	146.84	GBIF
Ticanto crista	P. Goetghebeur 3365		PNG	Madang	Hansa Bay, near Bogia, Laing Island. Coral island	-4.16667	144.867	GBIF
Ticanto crista	G.D. Weiblen YP4B0225	MIN	PNG	Morobe	Yawan Village	-6.1637	146.842	GBIF
Ticanto crista	H. Streimann NGF 44309		PNG	New Guinea	Lasanga Is., Lae subdistrict., Morobe District, T.N.G	-7.41397	147.251	GBIF
Ticanto crista	E.E. Henty NGF 27102		PNG	New Guinea	Sudest Island, Milne Bay Dist., Papua, sea level	-11.5	153.417	GBIF
Ticanto crista	J.M. Simaga 861		PNG	New Guinea	Kunini Village	-9.11667	143.017	GBIF
Ticanto crista	J.S. Womersley NGF 37162		PNG	New Guinea	Oriomo River, 20 miles from mouth, Daru, Western Dist. River bank, subject to tidal (fresh water) inundation	-8.91667	143.25	GBIF
Ticanto crista	M. Panoff 229		PNG	New Guinea	Vairamana, Pomio Subdistrict, East New Britain District. Secondary forest	-5.75	151.417	GBIF
Ticanto crista	C.D. Sayers NGF 19564		PNG	New Guinea	Leitre village, Sepik Dist., T.N.G. Edge of fresh water lagoon	-2.83333	141.583	GBIF
Ticanto crista	P.F. Stevens & Y. Lelean LAE 58625		PNG	West New Britain	Nantambu. District West New Britain, Subdistrict Hoskins	-5.49044	150.406	GBIF
Ticanto crista	W.R. Barker & A.N. Vinas LAE 66740		PNG	West New Britain	About ½km north of Wogonokai village, on coast. Subdist. Talasea, Dist. West New Britain. Rocky cliff-face. Rainforest	-5.21667	150.033	GBIF
Ticanto crista	J.R. Croft & P. Katik NGF 34506	CANB	PNG	West New Britain	Estaury of Pani River, Hixon Bay, District W. New Britain, Subdist. Hoskins	-4.93333	151.433	GBIF
Ticanto crista	E.E. Henty & Y. Lelean NGF 29471		PNG	West New Britain	Walo, Commodore Bay	-5.46667	150.917	GBIF
Ticanto crista	C.E. Carr 11516	CANB	PNG		Kanosia	-8.9667	146.95	GBIF
Ticanto crista	J.F. Maxwell 94- 56		THA	Kanchanaburi	Sangklaburi, Toong Yai Naresuan Wildlife Reserve, Lai Wo Subdistrict, Ban Saneh Pawng area (Karen Village), along Ro Kee Stream	15.3333	98.5	GBIF
Ticanto crista	K. Williams 1772	E	THA	Krabi		8.08548	98.9063	GBIF
Ticanto crista	J.F. Maxwell 91- 952		THA	Prae	Song, Mae Yom National Park, Kaht Hoy area, Saiab Subdistrict	18.3	100.283	GBIF
Ticanto crista	R. Geesink, T.A. Hattink & C. Charoenphol 7458		THA	Ranong	Hadsin dam	9.5	98.75	GBIF
Ticanto crista	K. Larsen ?	AAU	THA	Satun	South of Satun	6.57333	100.077	GBIF
Ticanto crista	P.S. Herendeen & R. Pooma 1-V-1999-3	US	THA	Narithiwat	Kulok river mouth next to bridge on road from Tak Bai to Sungai Ko-lok	6.02258	101.973	traced
Ticanto crista	D.K. Harder 4216	MO	VNM	Lang Son	Hau Lung District; Hau Lien Municipality; Hau Lien Protected Area; collections along trail from village committee chairmans house and east to top of hill; collections in degraded forest and on well eroded quartz hills with bamboo on upper slopes.	21.6708	106.39	GBIF
Ticanto crista	L.V. Averyanov VH4846	MO	VNM	Cao Bang	Distr. Tra Linh, municipality Quoc Toan, vicinity of Thang Heng and Lung Tao villages near Thang Heng lake. Broad-leaved evergreen closed primary forest on steep slopes and bluffs of limestone mesas and ridges.	22.7583	106.289	GBIF
Ticanto crista	D.K. Harder 4925	MO	VNM	Ha Giang	Quang Ba District; at Sin Suoi Ho village along Sin Suoi Ho River; on east side of river; collections on small limestone mountain, severely degraded but remnants of good habitat protected by sheer limestone rock faces; along ridge.	23.1158	105.03	GBIF
Ticanto crista	P. Curry 1447	K	VUT		Aniwa Island, Isavai village	-19.256	169.599	traced
Ticanto crista	P.S. Green RSNH1318	K	VUT		New Hebrides, Erromanga, between Nouanko Camp and Ipota, about 10km E of Ipota	-18.8228	169.155	traced
Ticanto crista	A. Morrison s.n.	K	VUT		Banks Islands, Port Patterson	-13.8257	167.556	traced
Ticanto crista	A. Morrison s.n.	K	VUT		New Hebrides, Port Vila	-17.7332	168.327	traced
Ticanto crista	P. Ala ?		VUT		Navenvene village	-17.7454	168.322	GBIF
Ticanto crista	P. Cabalion ?		VUT			-18.8795	169.15	GBIF
Ticanto crista	P. Curry ?		VUT			-16.229	167.422	GBIF
Ticanto elliptifolia	S.J. Li 026	IBSC	CHN	Guangdong	Fengkai, Qixing	23.7079	111.852	traced
Ticanto magnifoliolata	B.H. Chen et al. 1793	IBSC	CHN	Guangdong	Luoding, Caotang, Lianshi Village	22.6828	111.432	traced
Ticanto magnifoliolata	S.H. Chun 12435	IBSC	CHN	Guangxi	Fusui, Zhongdong, Luhan?, near Mt. Damingshan	22.6717	107.832	traced
Ticanto magnifoliolata	M. Shi s.n.	NPH	CHN	Guangxi	Leye, on the way from Gantian to Daping	24.863	106.552	traced
Ticanto magnifoliolata	H.Z. Lü, Y. Lin, L.L. Mo & B.Z. Ban 451023150325048LY	GXMG	CHN	Guangxi	Pingguo, Taiping, Chami Village, Chajiangtun	23.5583	107.557	traced
Ticanto magnifoliolata	H.Z. Lü, Z.Z. Lan & H.F. Cen 451224180425005LY	GXMG	CHN	Guangxi	Donglan, Sannong, Xiangtiandong Village, Haoyantun	24.4797	107.438	traced
Ticanto magnifoliolata	W.B. Xu, R.C. Hu & M.Q. Han ML1296	IBK	CHN	Guangxi	Huanjiang, Mulun Nature Reserve, Xiazhai Observation Deck	25.0861	108.376	traced
Ticanto magnifoliolata	Lingle Exped. 34420	IBK	CHN	Guangxi	Lingle, Xinhua, Sanhe	24.65	106.609	traced
Ticanto magnifoliolata	C. Wang 39106	IBK	CHN	Guangxi	Pingnan, Yaoshan, Luoxiang, Mt. Lingdingshan	23.2817	110.466	traced
Ticanto magnifoliolata	W.B. Xu, Y.S. Huang et al. LZ1370	IBK	CHN	Guangxi	Longzhou, Jinlong, Jinmei, Nongqiao	22.4889	106.707	traced
Ticanto magnifoliolata	H. Akiyama, H. Kudo, J. Murata, T. Sugawara, N. Tanaka, Y. Tateishi, Y.G. Wei & S.G. Wu 1233	KUN	CHN	Guangxi	Napo, Bing Mung, Rong La Shan	22.9703	105.974	traced
Ticanto magnifoliolata	R. Yang & L.B. Yan PB1356	GZAC	CHN	Guizhou	Pingba, Qibo, Taohua Village, Baidong	26.5565	106.184	traced
Ticanto magnifoliolata	Guizhou Exped. (C.S. Chang & Y.T. Chang) 3543	HGAS	CHN	Guizhou	Anlong, Huali, Dewo	25.0378	105.246	traced
Ticanto magnifoliolata	Anshun Exped. 744	HGAS	CHN	Guizhou	Xingyi, Qingnan, Yangping, Bajiaoping?	24.9342	104.996	traced
Ticanto magnifoliolata	C.Z. Dang 1684	HGAS	CHN	Guizhou	Ceheng, Shuanghe, Jishanlin	24.8416	106.097	traced
Ticanto magnifoliolata	Guizhou Exped. (C.S. Chang & Y.T. Chang) 7790	HGAS, IBSC, KUN, NAS, PE, WUK	CHN	Guizhou	Xingren, Nongchang, near Shanhe	25.437	105.064	traced
Ticanto magnifoliolata	Guizhou Exped. (C.S. Chang & Y.T. Chang) 3138	HGAS, IBSC, KUN, NAS, PE	CHN	Guizhou	Anlong, Longshan, Dushan	25.283	105.564	traced
Ticanto magnifoliolata	K.M. Feng 12522	KUN	CHN	Yunnan	Si-chour-hsien, Ping-chai	23.3205	104.739	traced
Ticanto magnifoliolata	Malipo Exped. 5326240386	IMDY	CHN	Yunnan	Mali, Xialiangshuijing	23.4229	105.094	traced
Ticanto magnifoliolata	X.X. Zhu, B. Xiao, G.S. Wang & J. Wang LiuED8612	KUN	CHN	Yunnan	Malipo, on the way from Huilong to Mabiao	23.4091	105.257	traced
Ticanto magnifoliolata	H. Wang 3842	HITBC	CHN	Yunnan	Simao, Simaogang	22.4942	100.586	traced
Ticanto magnifoliolata	J. Cai, J.D. Ya, X.Q. Yu, Y. Su & C.H. Li 14CS9136	KUN	CHN	Yunnan	Funing, Zhesang, Nonguo Village	23.7557	106.049	traced
Ticanto rhombifolia	Y.S. Huang & L. Wu H110397	IBK	CHN	Guangxi	Fangcheng, Dawangjiang Village	21.7692	108.353	traced
Ticanto rhombifolia	Dongxing Exped. 450681180510051LY	IBK	CHN	Guangxi	Dongxing, Jiangping, Hezhou	21.5829	107.972	traced
Ticanto rhombifolia	W.T. Tsang 29830		VNM	Quang Ninh	Sai Wong Mo Shan (Sai Vong Mo Leng), Lung Wan Village Dam-ha, Tonkin.	21.35	107.6	GBIF
Ticanto rhombifolia	W.T. Tsang 30682		VNM	Tonkin	Indo-China. Ho Yung Shan and vicinity. Tien-yen, Tonkin	21.3154	107.395	GBIF
Ticanto sinensis	S.G. Tang s.n.	SM	CHN	Chongqing	Shimiaoxiangzhai	29.2225	106.889	traced
Ticanto sinensis	T.P. Wang 10431	WUK	CHN	Chongqing	Wushan, Guandu River	30.9532	109.846	traced
Ticanto sinensis	S.R. Yi YSR9620	NPH	CHN	Chongqing	Qijiang, Wansheng, Heishangu Ave., opposite of Yaqulou	28.8951	107.002	traced
Ticanto sinensis	H.Y. Zou 0931	NF	CHN	Fujian	Mengtongyang, Chengmenkan	26.6431	118.075	traced
Ticanto sinensis	K.C. Ting & G.L. Shi 1337	WUK	CHN	Guangdong	Dinghu, Xinghu, Yuping Peak	23.1733	112.545	traced
Ticanto sinensis	F.C. How 74128	IBK	CHN	Guangdong	Zhaoqing, Qixingyan	23.0765	112.476	traced
Ticanto sinensis	H.Z. Lü, B.Y. Huang, L.L. Mo & M.R. Huang 451023150524040LY	GXMG	CHN	Guangxi	Pingguo, Taiping, Yanshan Village, Longjiutun	23.5372	107.517	traced
Ticanto sinensis	B.Y. Huang, Y.Y. Xie & H.F. Cen 451421160523025LY	GXMG	CHN	Guangxi	Fusui, Quli, Jidao Village	22.4851	107.788	traced
Ticanto sinensis	Long'an Exped. 450123130506007LY	IBK	CHN	Guangxi	Long'an, Nanxu, Longxintun	23.156	107.562	traced
Ticanto sinensis	Debao Exped. 451024160516009LY	IBK	CHN	Guangxi	Debao, Longguang, Miaohuai Village	23.098	106.723	traced
Ticanto sinensis	L.Y. Yu, Y.D. Peng & X.Y. Hu 451031140410083LY	GXMG	CHN	Guangxi	Longlin, Kechang, Haichang Village, Dankuntun	24.5814	105.378	traced
Ticanto sinensis	C.C. Huang et al. 2111	GXMI	CHN	Guangxi	Ningming, W Tingliang	22.2155	107.182	traced
Ticanto sinensis	Tianyang Exped. 451021150410060LY	GXMG	CHN	Guangxi	Tianyang, Wucun, Dalu Village, Longlitun	23.5725	106.846	traced
Ticanto sinensis	Z.T. Li 603637	IBK	CHN	Guangxi	On the slopes of the limestone mountain near the county seat of Lingle	24.3455	106.545	traced
Ticanto sinensis	Z.T. Li 601739	KUN	CHN	Guangxi	Bama, Xishan	24.2599	107.177	traced
Ticanto sinensis	Hongshui River Exped. 400	TNM	CHN	Guangxi	Napo, county town	23.3854	105.831	traced
Ticanto sinensis	H.B. Morse 545	K	CHN	Guangxi	Lingchuan	25.4596	110.278	GBIF
Ticanto sinensis	W.E. Qun 150	K	CHN	Guangxi	Liuzhou City, Longtan Park	24.3269	109.366	traced
Ticanto sinensis	R.C. Ching 8435	US	CHN	Guangxi	S Nanning, Dar Shan, Seh-Feng, Me-Jon	22.8167	108.367	traced
Ticanto sinensis	R.P. Clark 415	K, IBK	CHN	Guangxi	Jingxi, Longlin to Ande	23.0531	106.303	traced
Ticanto sinensis	R.P. Clark 429	K, IBK	CHN	Guangxi	Donglan county, Ma An mountain	24.5761	105.1	traced
Ticanto sinensis	Y. Jia 522325190716483LY	GZTM	CHN	Guizhou	Zhenfeng, Beipanjiang, Shuiyanba Village	26.6475	105.672	traced
Ticanto sinensis	Z.Y. Cao 544	PE	CHN	Guizhou	Ceheng, Rongxian, Huangtian to Maoping	25.044	105.653	traced
Ticanto sinensis	S.W. Teng 1641	IBSC	CHN	Guizhou	Kwanlin, Kwanlinchow, Da-Swee-Tzi	25.8711	105.556	traced
Ticanto sinensis	T.P. Wang 10830	IBK	CHN	Hubei	Badong	30.8548	110.283	traced
Ticanto sinensis	A. Henry 3416	K	CHN	Hubei	Ichang and immediate neighbourhood	30.692	111.286	GBIF
Ticanto sinensis	Xuanhan Exped. 1498	SM	CHN	Sichuan	Xuanhan, Dong'an	31.6563	107.942	traced
Ticanto sinensis	K.Y. Lang 3033	PE	CHN	Sichuan	Jiang'an, Nanyan, Hongfo Temple	28.712	105.063	traced
Ticanto sinensis	Y.J. Guo, W.L. Zhao, P.X. Tang, X.L. Jin & X.Q. Zhang 13CS7525	KUN	CHN	Yunnan	Yingjiang, 23 km milestone on X309 Road from Pingyuan to Kachang	24.9527	97.9373	traced
Ticanto sinensis	C.W. Wang 81282	KUN	CHN	Yunnan	Xichou, Changqing	23.3167	104.555	traced
Ticanto sinensis	J.F. Rock 2849	NY, US	CHN	Yunnan	between Szemao and Puerhfu	22.7667	101.083	traced
Ticanto sinensis	H. Sun 1672	KUN	CHN	Yunnan	Lushui, near Nujiang River	26.0777	98.8728	traced
Ticanto sinensis	M. Poilane 20257	K, L	LAO		Phou Phung pres de Louang Prabang	19.8856	102.135	traced
Ticanto sinensis	J.H. Lace 5769	K	MMR		Bhamo District, Lapycke to Sinlum Kabo	24.2159	97.1797	traced
Ticanto sinensis	P.A. Petelot 4757	A	VNM	Cao Bang	Ban Gioc	22.7617	106.703	GBIF
Ticanto sinensis	N.M. Cuong 464	MO	VNM	Ninh Binh	Cuc Phuong National Park	20.3547	105.608	traced
Ticanto szechuenensis	Z.Y. Liu 960468	IMC	CHN	Chongqing	Nanchuan, Mt. Jinfoshan, Sanquan, Lengshuixi	29.1288	107.206	traced
Ticanto szechuenensis	Z.Y. Liu, J. Zhang et al. S-2006	IMC	CHN	Chongqing	Jiangjin, Mt. Simianshan, Sunzigang	28.6764	106.375	traced
Ticanto szechuenensis	X.F. Zeng ZXF36083	CZH	CHN	Fujian	Zhangzhou, Yunxiao, Mt. Liangshan, Yunliang Reservoir	24.0288	117.475	traced
Ticanto szechuenensis	G.D. Ye 2038	PE	CHN	Fujian	Yunxiao, Xiaban, Mt. Dachenshan	23.9645	117.372	traced
Ticanto szechuenensis	K.P. To, W.T. Ts'ang & U.K. Ts'ang 12838	A, NAS	CHN	Guangdong	Near Fung wan, North River Region, Lung T'au Shan vicinities	24.7992	113.785	traced
Ticanto szechuenensis	Yue71 466	IBSC	CHN	Guangdong	Ruyuan, Daqiao	24.7753	113.266	traced
Ticanto szechuenensis	C. Huang 161752	IBSC	CHN	Guangdong	Gaoyao, at the foot of Mt. Dinghushan	23.2439	112.574	traced
Ticanto szechuenensis	Rong'an Exped. 450224170806001LY	GXMG	CHN	Guangxi	Liuzhou, Rongan, Banqiao, Guban Village	24.7613	109.529	traced
Ticanto szechuenensis	S.K. Lau 29560	IBSC	CHN	Hunan	Yizhang, Changle, Mt. Xinpingshan	25.2244	112.943	traced
Ticanto szechuenensis	X.C. Jiang, G.H. Tang & X.W. Pan SCSB-HNJ-0051	KUN	CHN	Hunan	Yongzhou, Jiangyong, Lanxi, Shangjin Village	25.1031	111.167	traced
Ticanto szechuenensis	K.T. Fu 12134	WUK	CHN	Sichuan	Mt. Emei, Heilongjiang	29.5626	103.395	traced
Ticanto szechuenensis	Sichuan Economic Plants 0281	PE	CHN	Sichuan	Junlian, Tuanjie, Lüzhu Temple	27.949	104.635	traced
Ticanto szechuenensis	F.T. Wang 22721	PE	CHN	Sichuan	Pingshan (as Ping-shan)	28.7111	104.013	traced
Ticanto szechuenensis	Sichuan Economic Plants 7065	CDBI	CHN	Sichuan	Weiyuan, North of Yuexitai, Laolonggou	29.6432	104.404	traced
Ticanto szechuenensis	Sichuan Economic Plants 487	CDBI	CHN	Sichuan	Leibo, Zhongshanping, Xining	28.5112	103.612	traced
Ticanto szechuenensis	Hongya Group 420	SM	CHN	Sichuan	Hongya, Liujiang, Shuguang, Laoyingzui	29.7184	103.235	traced
Ticanto szechuenensis	s. coll. 278	SM	CHN	Sichuan	Gongxian, Luobiao, Wangjia	28.0537	104.843	traced
Ticanto szechuenensis	s. coll. 704	SM	CHN	Sichuan	Changning, Xiangling, Liushuiyan	28.5629	104.807	traced
Ticanto szechuenensis	Tongliang Exped. 267	SM	CHN	Sichuan	Tongliang, Xiquan, Xiafeng	29.685	106.137	traced
Ticanto szechuenensis	X.F. Gao, Y.D. Gao & W.B. Ju HGX10640	CDBI	CHN	Sichuan	Xuyong, Shuiwei, Guandou Village, across the Qiaogoutou Rive	28.2186	105.584	traced
Ticanto vernalis	G.D. Ye s.n.	FJSI	CHN	Fujian	Yunxiao, Datian	25.7221	117.852	traced
Ticanto vernalis	W.D. Han 20542	NF	CHN	Fujian	Hua'an, Eshan	24.8535	117.591	traced
Ticanto vernalis	T. Chung M185	IBSC	CHN	Guangdong	Baoan, Shatian	22.7137	113.809	traced
Ticanto vernalis	N.K. Chun 42662	IBSC	CHN	Guangdong	Chaochow, Raoping, Fenghuangshan	23.9168	116.68	traced
Ticanto vernalis	G.X. Chen 24	IBSC	CHN	Guangdong	Haifeng, Lianhua, Lügong, Dakeng	22.8901	115.233	traced
Ticanto vernalis	Y. Tsiang 1751	IBSC	CHN	Guangdong	Luofushan, Sulao Taoist Temple, on the way to Dachashan	23.3251	113.991	traced
Ticanto vernalis	X.F. Zeng ZXF01805	CZH	CHN	Guangdong	Meizhou, Fengshun, Yanping, Fengbei Village	23.9579	116.588	traced
Ticanto vernalis	S.J. Li 787	IBSC	CHN	Guangdong	Guangzhou, Conghua, Daling, Shanshizao	23.713	113.697	traced
Ticanto vernalis	Z.Q. Song 2021061	IBSC	CHN	Guangdong	Huidong	23.2128	115.366	traced
Ticanto vernalis	S.Y. Hu 12897	PE	CHN	Hong Kong	Lantau, Tung Chung	22.2846	113.947	traced
Ticanto vernalis	S.Y. Hu 8570	PE	CHN	Hong Kong	N. T. Lan Nai Chung, Sai Kong	22.409	114.329	traced
Ticanto vernalis	N.Z. Wang s.n.	NAS	CHN	Zhejiang	Huangyan, Western part, Shidun	28.5923	121.098	traced
Ticanto vernalis	J. Zhao et al. 8524205	PE	CHN	Zhejiang	Jiande, Jiande Forest Farm	29.4859	119.262	traced
Ticanto vernalis	M.L. Yu et al. 25125	HHBG	CHN	Zhejiang	Jingning, Wangkeng	27.9359	119.718	traced
Ticanto vernalis	K.W. Jiang, J.P. Wu, Y.F. Zhang, M.S. Zhang et al. YS022	NPH	CHN	Zhejiang	Jiansae, Laufuyoh	29.4643	121.946	traced
Ticanto vernalis	Y.M. Zhang YS023	IBSC	CHN	Zhejiang	Jiansae, Laufuyoh	29.4643	121.946	traced
Ticanto vernalis	s. coll. 196	HHBG	CHN	Zhejiang	Linhai, Yongdongkou, Dakeng	28.9271	121.324	traced
Ticanto vernalis	H. Migo s.n.	NAS	CHN	Zhejiang	Ningpo, Tientungssu	29.8036	121.79	traced
Ticanto vernalis	M.L. Yu 25756	NAS	CHN	Zhejiang	Suichang, Daban, Yakoumen	28.3986	118.944	traced
Ticanto vernalis	L.S. Que 28517	ZM	CHN	Zhejiang	Tiantai, Gaoming	29.1944	121.065	traced
Ticanto vernalis	J.P. Feng 499	HHBG	CHN	Zhejiang	Wencheng, Shuiyanhu	27.8541	120.004	traced
Ticanto vernalis	Hangzhou Botanical Garden Herbarium 2493	HHBG	CHN	Zhejiang	Yueqing, Dajing, Dianling, Dazhuyuan, mountainside	28.4064	121.137	traced
Ticanto yunnanensis	T.P. Zhu 139	IBSC	CHN	Yunnan	Daxueshan District, Mengshangba, riverside of Nanting River	23.96	99.6364	traced
Ticanto yunnanensis	J.H. Zhang 19335	HITBC	CHN	Yunnan	Xishuangbanna, Mengla, Yiwu	21.9894	101.44	traced
Ticanto aff. szechuenensis	R.P. Clark 422	K, IBK	CHN	Guangxi	Jingxi to Longbang	23.0358	106.362	traced
Ticanto sp.	Y.M. Yi YYM05	NPH	CHN	Hubei	Enshi, near Wangjiajing	30.3621	109.553	traced
